# Supplementary material
Source: PubMed Central journal article supplement (PMC5070744)
Supplement: aasm.39.11.1903s1.pdf [file aasm.39.11.1903s1.pdf]

**Table S1**—Characteristics of the subjects in follow-up sample compared to those subjects that were lost to follow-up or those that died prior to the second visit.

| Characteristic            | Follow-up Sample<br>(N=4278) | Lost to follow-up<br>(N=812) | Died before follow-up<br>(N=694) | <i>P</i> -value* |
|---------------------------|------------------------------|------------------------------|----------------------------------|------------------|
| Age, years                | 62.8                         | 59.4                         | 71.2                             | <0.0001          |
| BMI, kg/m <sup>2</sup>    | 28.7                         | 28.2                         | 27.7                             | 0.025            |
| Sex, %                    |                              |                              |                                  |                  |
| Women                     | 55.1                         | 51.9                         | 42.5                             | 0.09             |
| Men                       | 44.9                         | 48.1                         | 57.5                             |                  |
| Race, %                   |                              |                              |                                  |                  |
| White                     | 79.7                         | 76.5                         | 75.5                             | <0.0001          |
| African-American          | 5.2                          | 9.2                          | 9.5                              |                  |
| Native American           | 10.5                         | 2.1                          | 13.5                             |                  |
| Hispanic                  | 3.7                          | 8.7                          | 0.9                              |                  |
| Other                     | 1.0                          | 3.5                          | 0.6                              |                  |
| Smoking Status, %         |                              |                              |                                  |                  |
| Never                     | 45.8                         | 52.7                         | 39.7                             | 0.027            |
| Former                    | 42.9                         | 38.7                         | 49.6                             |                  |
| Current                   | 11.3                         | 8.9                          | 10.7                             |                  |
| Baseline AHI, events/hr   | 8.7                          | 7.1                          | 10.4                             | 0.19             |
| Hypertension, %           | 47.9                         | 60.3                         | 72.8                             | <0.0001          |
| Diabetes, %               | 9.9                          | 5.7                          | 22.8                             | <0.0001          |
| Cardiovascular disease, % | 14.7                         | 12.1                         | 35.9                             | 0.051            |

\**P* value comparing the follow-up sample (N=4278) to those that were lost to follow-up (N=812)
